# Supplementary material
Source: ML conference proceedings conference paper supplement (https://openreview.net/forum?id=aedexcMXbKK)
Supplement: supplementary_material [file attachment]

## A APPENDIX

### A.1 DP-SGD CNN FOR MNIST

In this experiment, we use CNN for about 26k parameters and 52k parameters by widening layers to train on MNIST using DP-SGD. The result is similar comparing with the introduction that models with more parameters perform worse.

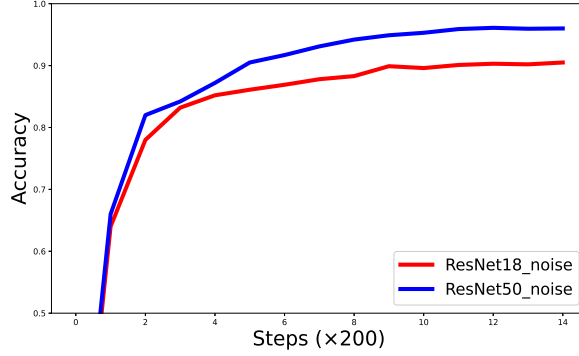

Figure 1: Accuracy for CNN using 52k parameters after DP-SGD perform 5% lower than 26k parameters.

This also shows that both width and depth of neural network would influence accuracy, leading to problem towards dimension.

### A.2 PROOF OF THEOREM 6

Before proof, we agree that character with hat is observation in this proof and truth value without hat.

*Proof.* First, since for normal distribution, if we have  $x \sim \mathcal{N}(a, b)$  and  $y \sim \mathcal{N}(c, d)$ , assume  $x$  and  $y$  are independent, then

$$x + y \sim \mathcal{N}(a + c, b + d)$$

Thus data with perturbation can regard as a new data set. We will show result with new  $\Sigma \triangleq \Sigma + \sigma^2 * \mathbf{I}_p$ . Also, we define  $\epsilon_{ij}$  is the bias for data  $i$  and feature  $j$  from true means,  $S_j$  is average estimation variance for feature  $j$  and  $\hat{\epsilon}_{kj}$  is the average bias for class  $k$  and feature  $j$ .

For estimation  $\hat{\Sigma}$ , we have following inequality:

$$P\left(\max_{j=1, \dots, p} |S_j^2 - \sigma_j^2| > \varepsilon\right) \leq \sum_{j=1}^p P(|S_j^2 - \sigma_j^2| > \varepsilon) \leq \sum_{j=1}^p P\left(\left|\sum_{i=1}^n (\epsilon_{ij}^2 - \sigma_j^2)\right| > n\varepsilon\right) \equiv I_1. \quad (1)$$

It follows from Bernstein's inequality that

$$P\left(\left|\sum_{i=1}^{n_k} (\epsilon_{kij}^2 - \sigma_{kj}^2)\right| > n\varepsilon\right) \leq 2 \exp\left\{-\frac{c}{2} \frac{n^2 \varepsilon^2}{\sum_{j=1}^p \sigma_j^2}\right\},$$

where  $c$  is the parameter for Bernstein's inequality.

Since  $\log p = o(n)$ , when  $p \rightarrow \infty$ ,  $n \rightarrow \infty$ . So  $I_1 = o_p(1)$ . Thus  $P(\max_{j=1, \dots, p} |S_j^2 - \sigma_j^2| > \varepsilon) \xrightarrow{P} 0$ . So  $\hat{\Sigma} = (1 + o_p(1))\Sigma$ .

Then we back to definition of classification error, since we assume  $\Sigma$  is already a diagonal matrix, after simplification, it can be written in form  $W(\hat{\delta}, \theta) = 1 - \Phi(\Psi)$  where

$$\Psi \geq \frac{(\mu_1 - \hat{\mu})' \hat{\Sigma}^{-1} (\hat{\mu}_1 - \hat{\mu}_2)}{\sqrt{(\hat{\mu}_1 - \hat{\mu}_2)' \hat{\Sigma}^{-1} (\hat{\mu}_1 - \hat{\mu}_2)}} (1 + o_p(1)),$$

Since  $\hat{\Sigma} = (1 + o_p(1))\Sigma$ ,  $\hat{\Sigma}^{-1} = (1 + o_p(1))\Sigma^{-1}$ .

For numerator, we have

$$(\mu_1 - \hat{\mu})' \hat{\Sigma}^{-1} (\hat{\mu}_1 - \hat{\mu}_2) = \frac{1}{2} \alpha' \hat{\Sigma}^{-1} \alpha - \frac{1}{2} (1 + o_p(1)) \sum \frac{\hat{\epsilon}_{1j}^2}{\sigma_j^2} + \frac{1}{2} (1 + o_p(1)) \sum \frac{\hat{\epsilon}_{2j}^2}{\sigma_j^2}.$$

The third term is in the same form with fourth, so they vanish.

For denominator, it is complicated, but in the same way.

$$\begin{aligned} (\hat{\mu}_1 - \hat{\mu}_2)' \hat{\Sigma}^{-1} (\hat{\mu}_1 - \hat{\mu}_2) &= \alpha' \hat{\Sigma}^{-1} \alpha + 2 \sum \alpha_j \frac{\hat{\epsilon}_{1j} \hat{\epsilon}_{2j}}{\sigma_j^2} + \sum \frac{(\hat{\epsilon}_{1j} - \hat{\epsilon}_{2j})^2}{\sigma_j^2} \\ &= \alpha' \hat{\Sigma}^{-1} \alpha + 2 \sum \frac{\alpha_j}{\sigma_j^2} (\hat{\epsilon}_{1j} - \hat{\epsilon}_{2j}) + \sum \frac{(\hat{\epsilon}_{1j} - \hat{\epsilon}_{2j})^2}{\sigma_j^2} \end{aligned}$$

The third term is with distribution  $\hat{\epsilon}_{1j} - \hat{\epsilon}_{2j} \sim \mathcal{N}(0, (4/n)\sigma_j^2)$ . In term, it need to divide  $\sigma_j^2$ , so it converges to  $4/n$ .

$$\sum \frac{(\hat{\epsilon}_{1j} - \hat{\epsilon}_{2j})^2}{\sigma_j^2} \xrightarrow{P} \frac{4p}{n}$$

Then the second term is the same.  $\frac{\alpha_j}{\sigma_j^2} (\hat{\epsilon}_{1j} - \hat{\epsilon}_{2j}) \sim N(0, (4/n)\alpha_j \sigma_j^{-2} \alpha_j)$ . Then as variance is  $o_p(1)$ , so the whole term is in the order of  $o_p(1)\alpha' \hat{\Sigma}^{-1} \alpha$ .

Finally, together above result, we can complete our proof.  $\square$

### A.3 LEMMA 2

Let  $n = n_1 + n_2$ . Assume that there exist  $0 < c_1 \leq c_2 < 1$  such that  $c_1 \leq n_1/n_2 \leq c_2$ . Let  $\tilde{T}_j = T_j - \frac{\mu_{j1} - \mu_{j2}}{\sqrt{s_{1j}^2/n_1 + S_{1j}^2/n_2}}$ . Then for any  $x \equiv x(n_1, n_2)$  satisfying  $x \rightarrow \infty$  and  $x = o(n^{1/2})$ ,

$$\log P(\tilde{T}_j \geq x) \sim -x^2/2, \quad \text{as } n_1, n_2 \rightarrow \infty$$

If in addition, if we have  $E|Y_{1ij}|^3 < \infty$  and  $E|Y_{2ij}|^3 < \infty$ , then

$$\frac{P(\tilde{T}_j \geq x)}{1 - \Phi(x)} = 1 + O(1)(1+x)^3 n^{-1/2} d^3, \quad \text{for } 0 \leq x \leq n^{1/6}/d$$

where  $d = (E|X_{1ij}|^3 + E|X_{2ij}|^3) / (\text{var}(X_{1ij}) + \text{var}(X_{2ij}))^{3/2}$  and  $O(1)$  is a finite constant depending only on  $c_1$  and  $c_2$ .

### A.4 PROOF OF THEOREM 8

*Proof.* First, since we consider Gaussian distribution, so lemma 2 is always tenable in below proof, we will use it directly.

Second, take into two parts. a) First, we check probability  $P(\max_{j>s} |D_j| > x)$ . For any probability, it is clear that

$$P\left(\max_{j>s} |D_j| > x\right) \leq \sum_{j=s+1}^p P(|D_j| \geq x).$$

With lemma 2 and the max variance bounded after normalization, we can infer that

$$P(\max_{j>s} |D_j| > v \frac{2}{\sqrt{n}} x) \leq (1 - \Phi(x)) \left(1 + C(1+x)^3 n^{-1/2} d^3\right)$$

with  $d = \left(E|Y_{1ij}|^3 + E|Y_{2ij}|^3\right) / (\sigma_{1j}^2 + \sigma_{2j}^2)^{3/2}$ .

Since  $|T_j|$  obtain following inequality:

$$|T_j| = \frac{|D_j|}{\sqrt{s_{1j}^2/n_1 + s_{2j}^2/n_2}} \geq \frac{|D_j|}{v} \sqrt{\frac{n_1 n_2}{n}} \geq \frac{\sqrt{n}}{2} \frac{|D_j|}{v}.$$

Also, with normal distribution

$$1 - \Phi(x) = \frac{1}{\sqrt{2\pi}} \int_x^\infty e^{-x^2/2} dx < \frac{1}{\sqrt{2\pi}} \int_x^\infty e^{-xy/2} dy,$$

we can give that

$$1 - \Phi(x) \leq \frac{1}{\sqrt{2\pi}} \frac{1}{x} e^{-x^2/2}$$

This together with the symmetry of  $D_j$  gives

$$P(|D_j| > v \frac{2}{\sqrt{n}} x) \leq 2 \frac{1}{\sqrt{2\pi}} \frac{1}{x} e^{-x^2/2} \left(1 + C(1+x)^3 n^{-1/2} d^3\right).$$

Combining the above inequality, we have

$$\sum_{j>s} P(|D_j| > v \frac{2}{\sqrt{n}} x) \leq (p-s) \frac{2}{\sqrt{2\pi}} \frac{1}{x} e^{-x^2/2} \left(1 + C(1+x)^3 n^{-1/2} d^3\right).$$

Since  $\log(p-s) = o(n^\gamma)$  with  $0 < \gamma < 1/3$ , if we let  $x = cn^{\gamma/2}$ , that is  $y = cvn^{(\gamma-1)/2}$ , then

$$\sum_{j>s} P(|D_j| \geq y) = n^{\gamma-1/2}.$$

So we can draw that

$$\sum_{j>s} P(|D_j| \geq y) \rightarrow 0.$$

This equality yields

$$P\left(\max_{j>s} |D_j| \geq y\right) \rightarrow 0.$$

b) Then we consider  $P(\min_{j \leq s} |D_j| \leq y)$ . Notice that when  $j \leq s$ ,  $\alpha_j = \mu_{1j} - \mu_{2j} \neq 0$ . So also with lemma 2, we define  $\tilde{D}_j = D_j - \alpha_j$ , it is same like a)

$$P(\max_{j \leq s} |\tilde{D}_j| > v \frac{2}{\sqrt{n}} x) \rightarrow 0. \quad (2)$$

For addition, there is an inequality

$$y > \min_{j \leq s} |D_j| = \min_{j \leq s} |\tilde{D}_j + \alpha_j| \geq \min_{j \leq s} |\alpha_j| - \max_{j \leq s} |\tilde{D}_j|.$$

So in probability

$$P\left(\min_{j \leq s} |D_j| \leq y\right) \leq P\left(\max_{j \leq s} |\tilde{D}_j| \geq \min_{j \leq s} |\alpha_j| - y\right).$$

Then with all assumption above and some  $\beta_n \rightarrow \infty$

$$\min_{j \leq s} |\alpha_j| - y = vn^{-\gamma} \beta_n - 2cvn^{(\gamma-1)/2} \geq y.$$

Together with (2), b) is established. Combination two parts complete the theorem.  $\square$

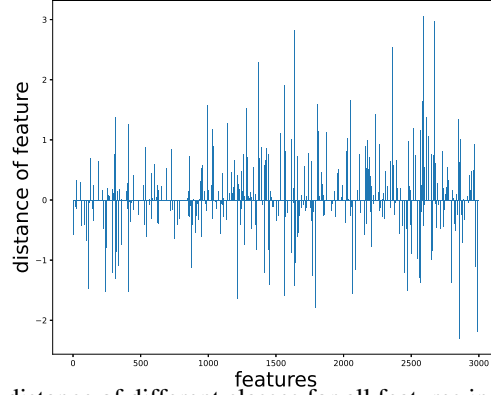

Figure 2: distance of different classes for all features in synthetic data

---

**Algorithm 1:** DP Feature Release Algorithm with k classes

---

- 1 **Input:**  $[[X_{11}], \dots, [X_{1n_1}]]$  to  $[[X_{k1}], \dots, [X_{kn_k}]]$
  - 2 Calculate average of features:  $\hat{\mu}_1 = [a_{11}, \dots, a_{1p}]$  to  $\hat{\mu}_k = [a_{k1}, \dots, a_{kp}]$
  - 3 Calculate max distance of features:  $D_j = \max_{c,q \leq k} |\hat{\mu}_{qj} - \hat{\mu}_{cj}|$
  - 4 Rank features with distance:  $X_r = [[x_{1[1]}], \dots, [x_{1[p]}]], \dots, [x_{n[1]}], \dots, [x_{n[p]}]]$
  - 5 Cut the first  $m$  features:  $X_c = [[x_{1[1]}], \dots, [x_{1[m]}]], \dots, [x_{n[1]}], \dots, [x_{n[m]}]]$
  - 6 Calculate the maximum norm in  $X_c$ :  $N_{max} \triangleq \max_{i \leq n, X_i \in X_c} \|X_i\|_1$
  - 7 Generate noise:  $n \times m$  matrix  $\varepsilon$  with i.i.d.  $\varepsilon_{ij} \sim \mathcal{N}(0, 2N_{max} \ln(1/\delta)/\epsilon)$
  - 8 Add noise to feature:  $\hat{X} = X_c + \varepsilon$
  - 9 **Output:** feature with noise  $\hat{X}$ , *Label*
- 

#### A.5 MEANS OF $\mu_1$ IN TOY EXPERIMENT

Fig. 2 is a bar figure of our  $\mu_1$  in toy experiment. We can see most of the features are sparse.

#### A.6 MULTIPLE CLASS CRITERION

For Fisher's classifier, we consider in binary classification. But our approach can be generalized to multiple classification. We list changed algorithm in CIFAR-10 part.

#### A.7 FISHER CLASSIFIER FOR CIFAR-10

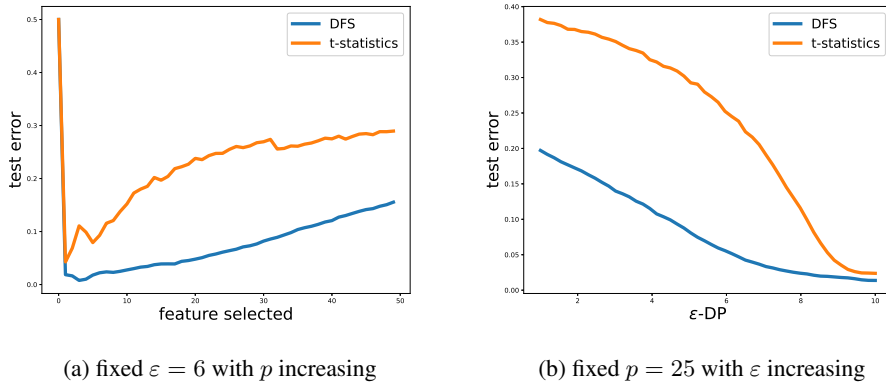

Figure 3: Results for CIFAR-10

For Fisher Classifier on CIFAR-10, left Fig. 3a shows our curve is lower and smoother which means robustness with dimension increasing. Right Fig.3b proves when  $\varepsilon$  is tiny, noise is large, DFS can perform over t-testing for more than 0.2 in test error.

#### A.8 EXPERIMENT FOR MNIST

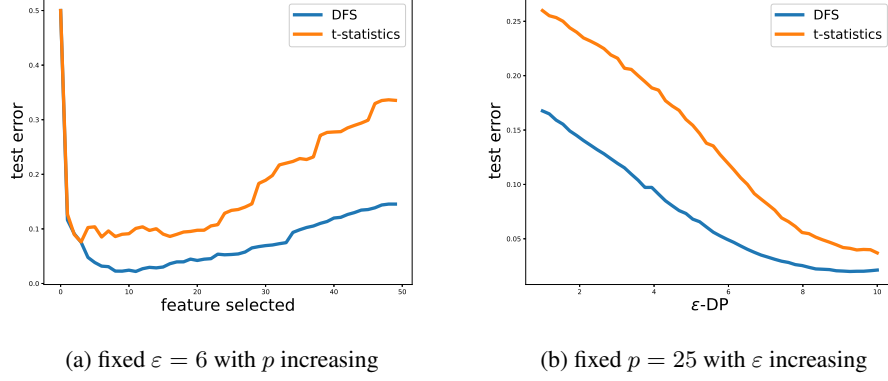

Figure 4: Results for MNIST

Left Fig.4a shows robustness similar to CIFAR-10 since curve is lower and smoother. Right Fig.4b shows t-testing is susceptible to DP noise, even  $\varepsilon = 10$  would cause error increasing.
